# Supplementary material for: Popular Diabetes Apps and the Impact of Diabetes App Use on Self-Care Behaviour: A Survey Among the Digital Community of Persons With Diabetes on Social Media
Source: Front Endocrinol (Lausanne). 2019 Mar 1;10:135. doi: 10.3389/fendo.2019.00135 (PMC6407478; doi:10.3389/fendo.2019.00135)
Supplement: Supplementary file 1 [file Table_1.XLSX]

## Sheet: Sheet1
Name of the diabetes app	Apps in type 1 diabetes	Apps in type 2 diabetes		Reported in both type of diabetes
Dexcom	128	4	132	Yes
mySugar	119	46	165	Yes
MyFitnessPal	42	20	62	Yes
Xdrip+	49	0	49	No
Carbs and Cals	46	0	46	No
Freestyle Libre/Free style LibreLink	34	8	42	Yes
One Drop Diabetes Management	25	9	34	Yes
Nightscout	33	0	33	No
Contour Next one	15	13	28	Yes
OneTouch Reveal	10	14	24	Yes
Diabetes: M	18	5	23	Yes
Dario	15	6	21	Yes
Medtronic apps	19	0	19	No
Glimp	14	2	16	Yes
accu-chek	3	12	15	Yes
Diasend	13	1	14	Yes
Samsung Health	2	12	14	Yes
SiDiary	10	3	13	Yes
sugarmate	10	1	11	Yes
Calorie king	10	1	11	Yes
Sugar sense	2	6	8	Yes
MyNetDiary	2	6	8	Yes
DAFNE online	8	0	8	No
Glooko	6	1	7	Yes
Glucose buddy	2	5	7	Yes
AndroidAPS	7	0	7	No
Diabetes Connect	4	2	6	Yes
Cronometer	3	3	6	Yes
Diabetes UK	3	3	6	Yes
LOOP/Loopkit	6	0	6	No
KH app	6	0	6	No
Nutrino	3	2	5	Yes
Liapp	3	2	5	Yes
Fitbit	3	2	5	Yes
Glucosio	2	3	5	Yes
nightguard	5	0	5	No
BE-App	5	0	5	No
OnTrack	0	5	5	No
DiaConnect	3	1	4	Yes
Calorie Counter by FatSecret	3	1	4	Yes
RapidCalc Diabetes Manage	4	0	4	No
MiniMed Connect	4	0	4	No
Beyond Type 1 Diabetes	4	0	4	No
Tidepool	2	1	3	Yes
Lifesum	2	1	3	Yes
GoMeals	2	1	3	Yes
Glucose Tracker	2	1	3	Yes
Glucose converter	2	1	3	Yes
KetoDiet	1	2	3	Yes
Carbs Manager	1	2	3	Yes
Glucose monitor	1	2	3	Yes
Spike	3	0	3	No
Nutritionix	3	0	3	No
NightWatch	3	0	3	No
Gluci-Check	3	0	3	No
LinkBlucon	3	0	3	No
FDDB Extender	3	0	3	No
Diabetes Tagebuch App	1	1	2	Yes
Blood Glucose by Japps	1	1	2	Yes
Glucose - Blood Sugar Tracker	1	1	2	Yes
Sugar Monster - Hop Eat n Play	2	0	2	No
PredictBGL Insulin Dose Cal	2	0	2	No
OpenAPS	2	0	2	No
OmniPod	2	0	2	No
myLife	2	0	2	No
Kaiser Permanente	2	0	2	No
InsulinBuddy	2	0	2	No
Cook and Count	2	0	2	No
Any-Dana	2	0	2	No
Lose it	2	0	2	No
Medisafe	0	2	2	No
Diabetes Plus	0	2	2	No
Diabetes Kit	0	2	2	No
AgaMatrix Diabetes Manager App	0	2	2	No
VitaScale	1	0	1	No
Tkk	1	0	1	No
t:slim X2 Insulin Pump	1	0	1	No
Strava	1	0	1	No
SmartLog	1	0	1	No
Quick Weight	1	0	1	No
Omron Wellness	1	0	1	No
NutriCheck	1	0	1	No
Noom: Health & Weight	1	0	1	No
My sugar diary	1	0	1	No
my plate	1	0	1	No
My Dario	1	0	1	No
MapMyWalk	1	0	1	No
LinkBluCon	1	0	1	No
Librealarm	1	0	1	No
KEFinder	1	0	1	No
JDRF Type 1 Discovery	1	0	1	No
Is It Vegan?	1	0	1	No
Insulin Calculator	1	0	1	No
Happ	1	0	1	No
Glukoo	1	0	1	No
Glucosurfer	1	0	1	No
GluCon	1	0	1	No
Glucoguide	1	0	1	No
FooDDB	1	0	1	No
Food tracker	1	0	1	No
Fit tracker	1	0	1	No
Express Scripts	1	0	1	No
Dottli	1	0	1	No
DiaBook	1	0	1	No
DiaBits	1	0	1	No
Diabnext	1	0	1	No
DiabetesGuru APK	1	0	1	No
Diabetes og kulhydrattælling	1	0	1	No
Diabetes NZ	1	0	1	No
Diabetes Easy	1	0	1	No
Diabetes Carb Counter	1	0	1	No
Care For Life	1	0	1	No
BZ-Rechner	1	0	1	No
Broteinheiten Rechner	1	0	1	No
Blue loop	1	0	1	No
Blood Glucose Meters - CareSens Dual	1	0	1	No
Beato	1	0	1	No
YAZIO	1	0	1	No
Weight Gurus	0	1	1	No
Verio	0	1	1	No
Truemeter	0	1	1	No
Sinovo	0	1	1	No
Nagbot diabetes	0	1	1	No
Microsoft HealthVault	0	1	1	No
Medisana: The VitaDock+ App 2.0	0	1	1	No
MapMyFitness	0	1	1	No
Low carb program	0	1	1	No
laborom	0	1	1	No
Habits: Diabetes Coach	0	1	1	No
Glycemia	0	1	1	No
Glucosezone	0	1	1	No
glucolog lite	0	1	1	No
Fooducate	0	1	1	No
Fit2me	0	1	1	No
ESYSTA App	0	1	1	No
Dr. Greger's Daily Dozen	0	1	1	No
DiaApp	0	1	1	No
DiabeticTracker	0	1	1	No
Diabetic diet	0	1	1	No
diabetes-ratgeber_x000D_	0	1	1	No
Diabetes Pilot	0	1	1	No
Diabetes 101	0	1	1	No
DCUK App	0	1	1	No
BG monitor	0	1	1	No
atkins carbs	0	1	1	No

## Sheet: Sheet3
q105TypeDiab105Whatisyour	q305AppName305Ifyouhavein
Type 1	MySugr
Type 1	One touch reveal
Type 1	Xdrip+
Type 1	Xdrip+
Type 1	MySugr_x000D_ Carbs&Cals_x000D_ Diabetes NZ
Type 1	MySugr_x000D_ Dexcom_x000D_ Diasend
Type 1	One Drop
Type 1	MySugr_x000D_ Diabetes Easy_x000D_ Broteinheiten und BZ Rechner
Type 1	mySugr_x000D_ diasend mobile app
Type 1	X drip plus
Type 1	xDrip, sugarmate, dexcom share, calorie king on ipad
Type 1	Mysugr_x000D_ Freestyle libre
Type 1	NS, NG, LOOP
Type 1	Xdrip+
Type 1	xDrip+_x000D_ Nightscout_x000D_ Carbs and Cals_x000D_ Cook and Count_x000D_ Diasend_x000D_ Android APS
Type 1	Noom_x000D_ Is it vegan_x000D_ My Chart, for emailing my MD_x000D_ Medscape_x000D_
Type 1	mysugr, Dexcom
Type 1	SiDiary
Type 1	xDrip+_x000D_ AndroidAPS_x000D_ Any-Dana_x000D_ Nightscout
Type 1	MySugr and Librelink
Type 1	Onedrop
Type 1	MySugr, fitbit, Nokia scale, lose it.
Type 1	mySugr
Type 1	One touch
Type 1	Spike_x000D_ Nightscout_x000D_ Nightscouter
Type 1	VitaScale
Type 1	Nightscout, Nightguard. I've built an OpenAPS artificial pancreas system and use iPhone and iPad as interfaces to communicate with it.
Type 1	Next one
Type 1	SiDiary
Type 1	Nightscout
Type 1	Nightscout
Type 1	PredictBGL, LinkBluCon
Type 1	Nico
Type 1	Sidiary Xdrip Libre
Type 1	Sugar smart_x000D_ S health
Type 1	MySugr_x000D_ My fitness pal
Type 1	Nightscout / GoMeals
Type 1	Nightscout uploader_x000D_ Diabetes M_x000D_ XDrip
Type 1	MySugr_x000D_ Carbs and Cals
Type 1	Nightscout
Type 1	Nightscout
Type 1	Mysugr
Type 1	Nightscout_x000D_ Medtronic_x000D_ t:slim
Type 1	Nightscout_x000D_ My fitness pal
Type 1	MySugr; Diabetes Forening Kulhydrat T�llings (Diabetes Association of Denmark's carbohydrate counting app)
Type 1	Xdrip+ (for getting CGMS readings from sensor)
Type 1	Nightscout, xdrip+ calorie King
Type 1	MySugr, LibreLink
Type 1	NightWatch, xDrip
Type 1	Mysugr
Type 1	MySugr
Type 1	Nutrino, nightscout, myfitnesspal
Type 1	Xdrip und Androidaps
Type 1	Nutrino and Sugar Sense
Type 1	SiDiary
Type 1	Samsung Health
Type 1	xDrip+
Type 1	xDrip_x000D_ NightScout_x000D_ One Touch_x000D_ Dexcom Share
Type 1	Nutritionix (Main app - use to calculate how many carbs I need to bolus for)_x000D_ YConnect (exercise)_x000D_ OneDrop (on a trial basis)
Type 1	Xdrip+
Type 1	RapidCalc _x000D_ Dexcom
Type 1	Nutrition IX_x000D_ MyChart_x000D_ Medtronic StartRight_x000D_ One Drop_x000D_ Insulin Calculator_x000D_ Beyond Type 1_x000D_ Type 1 Life_x000D_ JDRF Type 1 Discovery_x000D_ Diabetes Carb Counter_x000D_ Calorie King
Type 1	One drop
Type 1	One Drop
Type 1	One drop
Type 1	One drop
Type 1	Xdrip, AndroidAPS, Gluci-Check
Type 1	One Drop
Type 1	MySugr
Type 1	One drop_x000D_ Dexcom
Type 1	Xdrip+
Type 1	Rapid calc_x000D_ Dex com clarity
Type 1	SiDiary auf PC, iPad und Android
Type 1	Onedrop, nightguard
Type 1	OneDrop
Type 1	Xdrip_x000D_ Blucon_x000D_ Glukoo_x000D_ Too many to list
Type 1	mysugr
Type 1	One drop_x000D_ Diabetesguru
Type 1	Xdrip+, nightscout, nightguard
Type 1	One drop, MyFitnessPal, my plate, lose it
Type 1	tracker
Type 1	Sexcam_x000D_ My sugr
Type 1	Sidiary, accu-chek
Type 1	Sugarmate_x000D_ Dexcom_x000D_ Contour
Type 1	Sidiary
Type 1	mySugr
Type 1	One drop, mysugr
Type 1	Sugar Sense, Fitness Pal
Type 1	One touch
Type 1	sugr
Type 1	xDrip
Type 1	Xdrip Glimp diabetes:M and uploading data to NightScout
Type 1	Xdrip. Mysugr
Type 1	XDrip+
Type 1	MySugr
Type 1	SiDiary
Type 1	xdrip+, 600 Series uploader, mysugr
Type 1	xdrip+, AndroidAPS
Type 1	SiDiary, mySugr, Connect, mylife
Type 1	mySugr
Type 1	Xdrip; Happ
Type 1	Tkk
Type 1	Xdrip+_x000D_ OpenAPS
Type 1	Tracker by nutritionix
Type 1	mySugr, Spike (betaversion), link bluCon, KEFinder, NutriCheck, QuickWeight, nightguard, Nightscout, Health
Type 1	Xdrip _x000D_ Mysugr _x000D_ KH app _x000D_ Wetid _x000D_
Type 1	X Drip app for continuous glucose monitoring.
Type 1	xDrip
Type 1	Xdrip
Type 1	mySugr NightScout
Type 1	XDrip
Type 1	Xdrip+
Type 1	SiDiary _x000D_
Type 1	Xdrip _x000D_ Freestyle _x000D_
Type 1	Xdrip +
Type 1	Mysugr
Type 1	xDrip f�r unterwegs
Type 1	Xdrip_x000D_
Type 1	Xdrip+,Librealarm,NightWatch
Type 1	YAZIO
Type 1	xdrip
Type 1	mysugr
Type 1	SmartLog (connects with my CareSens N Glucose Meter) and My Fitness Pall (for diet reasons)
Type 1	MySugr_x000D_ MyFitnessPal
Type 1	MySugr
Type 1	xDrip_x000D_ Freestyle libre App_x000D_ Diasend_x000D_ myLife Software
Type 1	nightscout _x000D_ _x000D_ fooddb
Type 1	MySugr
Type 1	Nightscout_x000D_ Loop_x000D_ Spike
Type 1	Nightscout_x000D_ Night Watch_x000D_ Calorie King
Type 1	OmniPod_x000D_ Medtronic_x000D_ Type 1 Beyond_x000D_ Health_x000D_ MyFitnessPal
Type 1	Mysugr_x000D_ Carbs and Cals
Type 1	mySugr, Carbs & Cals
Type 1	One Drop
Type 1	Rapidcalc
Type 1	MySugr
Type 1	mySugr
Type 1
Type 1
Type 1
Type 1
Type 1
Type 1
Type 1
Type 1
Type 1
Type 1	xDrip+
Type 1	MySugr
Type 1	Mysugr
Type 1	MySugr
Type 1	MySugr
Type 1	Mysugr
Type 1	MySugr
Type 1	mySugr
Type 1	MySugr
Type 1	mySugr
Type 1	MySugr
Type 1	MySugr
Type 1	Mysugr
Type 1	mysugr
Type 1	mysugr
Type 1	Mysugr
Type 1	mysugr
Type 1	Mysugr
Type 1	MySugr
Type 1	mySugr
Type 1	MySugr
Type 1	MySugr
Type 1	MySugr
Type 1	Mysugr
Type 1	Mysugr
Type 1	mySugr
Type 1	Mysugr
Type 1	mysugr
Type 1	MySugr
Type 1	mysugr
Type 1	MySugr
Type 1	mySugr
Type 1	MySugar_x000D_ InsulinBuddy
Type 1	Mysugar
Type 1	Mysugar
Type 1	Mysugar
Type 1	MySugar
Type 1	MySugar
Type 1	Mysugar
Type 1	Mysugar
Type 1	MySugar
Type 1	MySugar
Type 1	MySugar
Type 1	mySugar
Type 1	MyNetDiary (for diabetes)
Type 1	MyFitnessPal, medtronic, apple health, Kaiser Permanente
Type 1	MyFitnessPal to give me accurate carb counts for meals
Type 1	MyFitnessPal to calculate carbs_x000D_ Diabetes:m, use only occasionally
Type 1	MyFitnessPal - to get accurate carb counts
Type 1	MyFitnessPal
Type 1	My Sugr_x000D_ Libre Link_x000D_ FDDB (Datenbank f�r N�hrwerte)
Type 1	my sugr_x000D_ carbs and cals_x000D_
Type 1	My sugr
Type 1	My sugr
Type 1	My sugr
Type 1	My Sugger_x000D_ LibreLink_x000D_
Type 1	My suggar
Type 1	My Sugar_x000D_ Night Scout
Type 1	My sugar monster
Type 1	My sugar fddb Dexcom_x000D_
Type 1	My sugar _x000D_ _x000D_ Fit bit
Type 1	My Sugar
Type 1	My Sugar
Type 1	My sugar
Type 1	My sugar
Type 1	My net diary - used to count calories and macros
Type 1	My net diary
Type 1	My Fitness Pal, Libre Link, Diasend, Diabetes forum, Diabetes UK, mysugr
Type 1	My fitness pal, Calorie king & Medtronic apps
Type 1	My fitness pal_x000D_ Webmd
Type 1	My Fitness Pal_x000D_ Mayo Clinic
Type 1	My fitness pal_x000D_ Accu chek_x000D_
Type 1	My fitness pal for carb counting
Type 1	my fitness pal app free
Type 1	My fitness pal
Type 1	My fitness pal
Type 1	My Dario
Type 1	Medtronic StartRight; Medtronic Minimed; My BG
Type 1	Medtronic StartRight app
Type 1	Medtronic startright _x000D_ Diabetic meal plan_x000D_ Minimed connect pump & CGM
Type 1	Medtronic Contour one.
Type 1	Medtronic
Type 1	Medtronic
Type 1	Mastering diabetes_x000D_ Cronometer
Type 1	Loop/loopkit
Type 1	Loop (DIY Closed Loop System), Nightscout, Dexcom CGM app, Dexcom Clarity, Dexcom Follow
Type 1	Lifesum
Type 1	Librelink, medtronic app
Type 1	librelink, glimp, mysugr
Type 1	LibreLink, Dexcom Mobile, xDrip+
Type 1	LibreLink_x000D_ xDrip+
Type 1	LibreLink_x000D_ MySugr
Type 1	Librelink_x000D_ Carbs & caps_x000D_
Type 1	LibreLink_x000D_
Type 1	Librelink - for librelink freestyle sensor._x000D_ Hypoband - for a watch that detects hypos at night.
Type 1	LibreLink
Type 1	LibreLink
Type 1	Librelink
Type 1	LibreLink
Type 1	LibreLink
Type 1	LibreLink
Type 1	Librelink
Type 1	LibreApp
Type 1	Libre view
Type 1	Libre Link, Libre Link up, Diabetes Tagebuch, GLIMP
Type 1	Libre Link, Liapp,Libre scan
Type 1	Libre link_x000D_ X drip+_x000D_ Diabetes m_x000D_ Sugr und. Nightscout
Type 1	Libre Link_x000D_ AnyDana_x000D_ XDrip_x000D_
Type 1	Libre Link mysugr Diabetes Coach
Type 1	Libre Link
Type 1	Libre Link
Type 1	Libre Link
Type 1	Libre Link
Type 1	Libre Link
Type 1	Libre link
Type 1	Libre Link
Type 1	Libre link
Type 1	Libre Link
Type 1	Libre Link
Type 1	Libre Link
Type 1	Libre App
Type 1	Libre Alarm_x000D_ xDrip+_x000D_ Nightscout_x000D_ Carve & Cals
Type 1	LIBRE
Type 1	Libre
Type 1	Libre
Type 1	Libralink, carbs & cals, diabetes forum, diabetes app
Type 1	Libra sensor
Type 1	Liapp, xdrip, Libre Link
Type 1	KH-App_x000D_ LibreLink
Type 1	Kh Berechnet, Libre App
Type 1	Kh app
Type 1	Keto
Type 1	Insulin buddy
Type 1	installed at least 3 or 4, using none because i have a freestyle libre which isn't compatible with iOS
Type 1	I use MyFitnessPal in order to get carbohydrate & protein (if abnormal to regular eating patterns) amounts for dosage
Type 1	I have a CGM: Medtronic with my secondary iphone. If I don't have my sensor, I will use one of these apps: Diabetes:M, MySygar.
Type 1	GoMeals, diabetesM, Lenny, MapMyWalk
Type 1	Glucosio
Type 1	Glucosio
Type 1	Glucose Tracker
Type 1	Glucose monitor
Type 1	Glucose converter
Type 1	glucose buddy
Type 1	Glucoguide
Type 1	Glucicheck
Type 1	Gluccose Buddy f�r iPhone, Diabetes: M android( die App f�r android ist um L�ngen besser)
Type 1	Glooko
Type 1	Glooko
Type 1	Glimp. And GluCon
Type 1	Glimp, mysugr, myfitness pal
Type 1	Glimp, Diabetes_m
Type 1	Glimp, Diabetes:M
Type 1	Glimp
Type 1	Glimp
Type 1	Glimp
Type 1	Glimp
Type 1	glimp
Type 1	Glimp
Type 1	FreestyleLibrelink
Type 1	Freestyle Librelink_x000D_ Appel heath_x000D_ before I used also BGluMon Pro
Type 1	Freestyle librelink- DE
Type 1	Freestyle LibreLink
Type 1	Freestyle LibreLink
Type 1	FreeStyle LibreLink
Type 1	Freestyle Librelink
Type 1	Freestyle LibreLink
Type 1	FreeStyle LibreLink
Type 1	FreeStyle LibreLink
Type 1	Freestyle Libre_x000D_ Xdrip_x000D_ Mysugar
Type 1	Freestyle Libre Link_x000D_ Liapp_x000D_ Glimp
Type 1	FreeStyle Libre link
Type 1	FreeStyle Libre Link
Type 1	Freestyle Libre LibreLink
Type 1	Freestyle Libre , Diabestes wir tauschen und Freestyle Libre Anwender
Type 1	freestyle libre
Type 1	Freestyle libre
Type 1	Freestyle libre
Type 1	Freestyle Libre
Type 1	Freestyle libre
Type 1	Free Style Libre Link
Type 1	Free style libre app
Type 1	free style libre app
Type 1	Free Style Libre
Type 1	Fitness Pal, Medtronic uploader for insulin pump
Type 1	Fitness pal
Type 1	Fitbit, minimed, nutrino
Type 1	Fit tracker and food tracker
Type 1	Fatsecret, not a specific diabetes app tho
Type 1	FatSecret_x000D_ TreatingT1D
Type 1	Express Scripts, Carb Manager
Type 1	Eversense
Type 1	Eversense
Type 1	Es handelt sich um AndroidAps (selbst kompiliert, weil es das nicht als fertige App gibt; ist n�mlich ein Diy-Ding), xdrip+ (zus�tzlich nightscout auf dem PC)
Type 1	Dottli. I also used to have mySugr.
Type 1	Diasend
Type 1	Diasend
Type 1	Diasend
Type 1	DiaConnect
Type 1	DiaConnect
Type 1	DiaBook
Type 1	DiaBits Dexcom
Type 1	DiabetesM _x000D_
Type 1	DiabetesConnect_x000D_ _x000D_ LibreLink
Type 1	Diabetes4 life
Type 1	Diabetes:M (replacing MySugr). Diasend. DAFNE. Carbs&Cals. MyFitnessPal (for carb infirmation).
Type 1	Diabetes:M
Type 1	Diabetes:M
Type 1	Diabetes:M
Type 1	Diabetes:M
Type 1	Diabetes:M
Type 1	Diabetes: M
Type 1	Diabetes UK
Type 1	Diabetes Monster
Type 1	Diabetes M: _x000D_ One touch revel
Type 1	Diabetes M
Type 1	Diabetes Contour. Next one app
Type 1	Diabetes Connect, mySugr, KH-App, FDDB Extender
Type 1	Diabetes Connect
Type 1	Diabetes Connect
Type 1	diabetes connect
Type 1	DexcomClarity, my sugr
Type 1	Dexcom/Clarity
Type 1	Dexcom, xdrip, myfitnesspal
Type 1	Dexcom, sugarmate
Type 1	Dexcom, Strava, my fitness pal,
Type 1	Dexcom, Rapid calc, One Touch, Glooko, One Drop
Type 1	Dexcom, OneTouchReveal, MySugr
Type 1	Dexcom, one drop
Type 1	Dexcom, Nightscout, Sugarmate
Type 1	Dexcom, my sugr
Type 1	Dexcom, diasend
Type 1	Dexcom, Dexcom Clarity, Glooko
Type 1	Dexcom, Dexcom clarity
Type 1	Dexcom, Dexcom clarity
Type 1	Dexcom, Dexcom clarity
Type 1	Dexcom, Dexcom Clarity
Type 1	Dexcom, Dario
Type 1	Dexcom, clarity, OneTouch, Share , my fitness pal
Type 1	Dexcom_x000D_ SugarMate
Type 1	Dexcom_x000D_ SugarMate
Type 1	Dexcom_x000D_ Sugarmate
Type 1	Dexcom_x000D_ Previously: One Touch and Contour
Type 1	Dexcom_x000D_ Predict BGL_x000D_
Type 1	Dexcom_x000D_ MySugr _x000D_ Sugarmate
Type 1	Dexcom_x000D_ MyFitnessPal for carb counting
Type 1	Dexcom_x000D_ MyFitnessPal _x000D_
Type 1	Dexcom_x000D_ DiaBits _x000D_ My Fitness Pal
Type 1	Dexcom_x000D_ Dario_x000D_ Mysugr
Type 1	dexcom_x000D_ Calorie Count_x000D_ google
Type 1	Dexcom_x000D_
Type 1	dexcom_x000D_
Type 1	Dexcom_x000D_
Type 1	Dexcom with share
Type 1	Dexcom User und Follow
Type 1	Dexcom suite (regular app, Share, Clarity)
Type 1	Dexcom Share
Type 1	Dexcom share
Type 1	dexcom nightscout
Type 1	Dexcom mobile_x000D_ Dexcom clarity_x000D_ Starting tidepool
Type 1	Dexcom Mobile
Type 1	Dexcom g5, follow app and clarity
Type 1	Dexcom G5, Dexcom Share, Sugarmate, KP (Kaiser HMO app)
Type 1	Dexcom G5, Dexcom clarity, MyChart, Medtronic
Type 1	Dexcom G5_x000D_ One Drop_x000D_ Apple Health
Type 1	Dexcom G5_x000D_ MyFitnessPal
Type 1	Dexcom g5 mobile,kh app
Type 1	Dexcom G5 mobile_x000D_ mySugr
Type 1	Dexcom G5 mobile CGM app_x000D_ Dexcom Clarity _x000D_
Type 1	Dexcom g5 mobile
Type 1	DexCom G5 mobile
Type 1	Dexcom G5 Mobile
Type 1	Dexcom G5 mg/dl_x000D_ _x000D_ Dexcom G5 mmol/l
Type 1	Dexcom G5 CGM
Type 1	Dexcom G5 _x000D_ Loop
Type 1	Dexcom G5
Type 1	Dexcom Dexcom Share Nightscout. A1c converter
Type 1	Dexcom Clarity, dexcom
Type 1	Dexcom Clarity_x000D_ Dexcom_x000D_
Type 1	Dexcom Clarity Reports, Lifesum for Food Tracking, Insulator
Type 1	Dexcom Clarity
Type 1	Dexcom CGM
Type 1	Dexcom CGM
Type 1	Dexcom app compatible with G5 transmitter/senzor. Use about 3weeks per month
Type 1	Dexcom app
Type 1	Dexcom and Dexcom Clarity
Type 1	Dexcom _x000D_ Dexcom Share_x000D_ My Fitness Pal
Type 1	Dexcom _x000D_ Dexcom Clarity_x000D_ MyFitnessPal_x000D_ Tidepool_x000D_ Nightscout Watch (Garmin)_x000D_ OneDrop (used while MDI, not using while pumping)
Type 1	Dexcom _x000D_ Dexcom clarity_x000D_ Glooko
Type 1	Dexcom
Type 1	Dexcom
Type 1	Dexcom
Type 1	Dexcom
Type 1	Dexcom
Type 1	Dexcom
Type 1	Dexcom
Type 1	Dexcom
Type 1	Dexcom
Type 1	Dexcom
Type 1	Dexcom
Type 1	Dexcom
Type 1	Dexcom
Type 1	Dexcom
Type 1	Dexcom
Type 1	Dexcom
Type 1	Dexcom
Type 1	dexcom
Type 1	Dexcom
Type 1	Dexcom
Type 1	Dexom G5 mobile
Type 1	Dario, One drop, Diabetes:M... I use the health app on my iPhone to grab all glucose reading and use the Diabetes:M for trends and averages
Type 1	Dario, my sugar, my fitness pal
Type 1	Dario, Minimed Connect, Calorie King, My Fitness Pal
Type 1	Dario Health_x000D_ Dexcom Clarity
Type 1	Dario health blood glucose app
Type 1	Dario glucose app
Type 1	Dario for BSL testing_x000D_ Fat Secret for carb counting
Type 1	Dario
Type 1	Dario
Type 1	Dario
Type 1	DafneOnline
Type 1	DAFNE_x000D_ DAFNE ONLINE_x000D_ CARBS & CALS_x000D_ MY DIABETES MY WAY_x000D_ DIABETES.CO.UK_x000D_
Type 1	DAFNE Online_x000D_ mySugr_x000D_ Carbs & Cals_x000D_ One Drop_x000D_ Have them all installed but don't use regularly
Type 1	DAFNE Online_x000D_ Carbs and cals
Type 1	DAFNE
Type 1	D_x000D_ A_x000D_ F_x000D_ N_x000D_ E app
Type 1	cronometer.com for counting foods
Type 1	Cronometer
Type 1	Contur
Type 1	Contour. Myfitnesspal, careforlife
Type 1	Contour_x000D_ Carbs & Cals _x000D_ Blood Glucose Converter
Type 1	Contour next one A
Type 1	Contour next one
Type 1	Contour Next app for mete r
Type 1	Contour Diabetes app, MySugr, Diabetes:M
Type 1	Contour diabetes app_x000D_ Carbs & Cals app
Type 1	Contour Diabetes app
Type 1	Contour _x000D_ Carbs and cals
Type 1	Contour
Type 1	Continuous glucose monitor
Type 1	Clarity dexcom_x000D_ Glucosurfer
Type 1	Cgm. Dexcom G5. Pedometer.
Type 1	Care link from Medtronic
Type 1	Carbs&scales of food _x000D_ Calculator for carb counting and ratios
Type 1	Carbs n cals
Type 1	Carbs and cals_x000D_ Diaconnect
Type 1	Carbs and cals_x000D_ DAFNE online_x000D_ Myfitnesspal
Type 1	carbs and cals _x000D_ my sugr_x000D_ fitness pal
Type 1	Carbs and Cals _x000D_
Type 1	Carbs and Cals
Type 1	Carbs and Cals
Type 1	Carbs and cals
Type 1	Carbs and cals
Type 1	Carbs and cals
Type 1	Carbs and Cals
Type 1	Carbs and cals
Type 1	Carbs and cals
Type 1	Carbs and Cals
Type 1	Carbs and cals
Type 1	Carbs and cals
Type 1	Carbs and Cals
Type 1	Carbs and cals
Type 1	Carbs and Cals
Type 1	Carbs and calories_x000D_ _x000D_ Diasend_x000D_ _x000D_ Patient access
Type 1	Carbs and calories
Type 1	carbs and calorie counting
Type 1	Carbs and cal_x000D_ Cooks&count
Type 1	Carbs and cals, mysgr
Type 1	Carbs & Cals_x000D_ Libre link_x000D_ One drop_x000D_ Medical ID
Type 1	Carbs & Cals_x000D_ Dexcom G5_x000D_
Type 1	Carbs & cals
Type 1	Carb counting
Type 1	Carb counter
Type 1	Carb and cails _x000D_ Countour 1
Type 1	CalorieKing_x000D_ OneDrop_x000D_ MySugr_x000D_ Glooko _x000D_ Beyond Type 1_x000D_ Diasend _x000D_ Diabnext _x000D_ Guardian Connect
Type 1	Calorie King
Type 1	Calorie King
Type 1	Calorie king
Type 1	Blue loop
Type 1	Blook sugar testing
Type 1	Blood Glucose Tracker, mychart, in case of emergency
Type 1	Blood Glucose by Japps
Type 1	Beyond Type 1_x000D_ Dexcom Clarity_x000D_ mySugr _x000D_ One Drop
Type 1	Beato
Type 1	BE-App_x000D_ Gluci-Check_x000D_
Type 1	BE-App
Type 1	BE-App
Type 1	BE App, Freestyle Libre
Type 1	BE App
Type 1	AndroidAPS
Type 1	Ambrosia, xDrip, Nightscouter, Nightguard, and lots more health and glucose management apps
Type 1	Accuchek, mysugr
Type 1	abbott's app for the libre monitor
Type 1	Abbott Freestyle LibreView_x000D_ Carbs and Cals_x000D_ Apple Health_x000D_ Outlook address and diary
Type 1	1. Dexcom G5 mobile_x000D_ 2. Diasend
Type 1	_x000D_ Diabetes:m_x000D_ Dexcom g5 mobile
Type 1	_x000D_ _x000D_ Dario
Type 1	Dexcom, sugarmate _x000D_ Omnipod _x000D_ Not Diabetes specifically but I use fitness pal to log my meals, exercise, and water
Type 1	Carbs and calories

## Sheet: Sheet4
q105TypeDiab105Whatisyour	q305AppName305Ifyouhavein
Type 2	Verio OneTouch Reveal to track blood sugars_x000D_ MyFitnessPal to track everything I eat_x000D_ Fitbit to track activity
Type 2	Roche Accu Check Connect_x000D_ My Sugar
Type 2	Sugar sense
Type 2	Samsung Health
Type 2	Samsung health
Type 2	MySugr_x000D_ Tidepool
Type 2	MySugr, Nutrino
Type 2	OneDrop
Type 2	Mysurg _x000D_ Diabetes UK _x000D_ Low carb program
Type 2	Samsung Health
Type 2	S health_x000D_ Myfitnesspal
Type 2	mysugr and atkins carbs
Type 2	One drop, my fitness pal, health
Type 2	Not sure
Type 2	One touch reveal
Type 2	Samsung health
Type 2	Nutrino
Type 2	OnTrack
Type 2	One drop
Type 2	on track
Type 2	On Track
Type 2	One Drop_x000D_ _x000D_
Type 2	One drop
Type 2	MySugr_x000D_ Nutrition infomyfitnesspal
Type 2	SiDiary
Type 2	mySugr and MyFitnessPal
Type 2	One drop
Type 2	sugar sense
Type 2	MySugr and My Fitness Pal
Type 2	Sugar diary_x000D_ My Fitness Pal
Type 2	Samsung note 8
Type 2	One Drop _x000D_ My Fitness Pal
Type 2	One touch reveal
Type 2	OnTrack
Type 2	mySugr GmbH
Type 2	One touch
Type 2	MySugr_x000D_ MyFitnessPal
Type 2	One Touch
Type 2	One Touch
Type 2	One touch
Type 2	mysugr _x000D_ glucolog lite
Type 2	sidiary von Sinovo
Type 2	Samsung Health, and Myfitnesspal
Type 2	Sugar sense
Type 2	Sugar sense_x000D_ Glucose monitor
Type 2	OneTouch
Type 2	Surg
Type 2	Track blood sugar each morning in Samsung Health SHealth also calories and exercise
Type 2	MySugr, SiDiary
Type 2	Samsung health measure seversl including add blood sugar heart rate oxygen and stress._x000D_
Type 2	Truemeter
Type 2	trulicity
Type 2	MySugr/Logbook
Type 2	One touch
Type 2	MySugr
Type 2	Samsung Health
Type 2	OneTouch Reveal
Type 2	Sugar sense
Type 2	Nagbot
Type 2	MySugr
Type 2	one drop
Type 2	Sugar sense
Type 2	mysugr
Type 2	MySugr
Type 2	MySugr
Type 2	mySugr
Type 2	mySugr
Type 2	MySugr
Type 2	mysugr
Type 2	mySugr
Type 2	MySugr
Type 2	Mysugr
Type 2	MySugr
Type 2	MySugr
Type 2	Mysugr
Type 2	Mysugr
Type 2	Mysugr
Type 2	MySugar App
Type 2	MySugar
Type 2	MySugar
Type 2	MySugar
Type 2	Mysgr
Type 2	MyNetDiary - Diabetes Edition_x000D_ One Drop_x000D_ Contour Diabetes App_x000D_ MapMyFitness_x000D_ Fitbit_x000D_ Weight Gurus_x000D_ Omron Wellness_x000D_ Apple Health
Type 2	Mynetdiary
Type 2	MyFitnessPal, Cronometer, Ketodietapp.com, DCUK, mySugr
Type 2	myfitnesspal_x000D_ OneTouch_x000D_
Type 2	Myfitnesspal
Type 2	My sugr, laborom
Type 2	my Sugr_x000D_ Aga Matrix
Type 2	My Sugr
Type 2	My Sugr
Type 2	My sugr
Type 2	My sugr
Type 2	my Sugar, AccuCheck
Type 2	my sugar app and my fitness pal
Type 2	my sugar
Type 2	My sugar
Type 2	My sugar
Type 2	My Sogar
Type 2	My Shugger, Eversense
Type 2	My net diary diabetes
Type 2	My Net Diary
Type 2	My Fitness Pal, Contour Diabetes App
Type 2	My fitness pal
Type 2	Microsoft Health Vault (keine reine Diabetes App)
Type 2	Medisana
Type 2	Medisafe_x000D_ MyNetDiary_x000D_ Blood Glucose Converter
Type 2	Medisafe
Type 2	Lifesum
Type 2	Librelink_x000D_ MySugr_x000D_ Fit
Type 2	Librelink freestyle
Type 2	LibreLink
Type 2	Ion check & glgouse buddy
Type 2	Insu�logig
Type 2	Health App.
Type 2	Health
Type 2	Go meals to track carbs in foods. _x000D_ Samsung health to track exercise
Type 2	Glycemia, Glimp, Glucosio, Liapp, BG Monitor, Cronometer
Type 2	Glucosio on iOS and Android
Type 2	Glucosezone_x000D_ Myfitnesspal
Type 2	Glucose, Cronometer, Contour
Type 2	Glucose_x000D_ Fooducate
Type 2	Glucose buddy. Now dicountinued
Type 2	Glucose Buddy
Type 2	Glucose buddy
Type 2	Glucose Buddy
Type 2	Glucose - track blood sugar
Type 2	Glooko
Type 2	Glimp, Liapp, glucosio
Type 2	FreeStyle Libre
Type 2	FreeStyle Libre
Type 2	freestyle libre
Type 2	Freestyle
Type 2	freedomfromdiabetes.org
Type 2	Freedom from diabetes
Type 2	Freedom from diabetes
Type 2	Fit 2 Me
Type 2	FatSecret_x000D_ Blood Glucose Tracker
Type 2	Farewell
Type 2	ESYSTA
Type 2	Dont remember name. It was one to track sugar and levels. Couldnt figure it out.
Type 2	Diasend_x000D_ LibreLink App
Type 2	DiaPlus Typ2 (Google APPStore)
Type 2	DiaConnect
Type 2	Diabetic Tracker. Just for the BS input_x000D_ My fitness pal. To check my carbs and sugars in foods.
Type 2	Diabetic diet
Type 2	diabetes-ratgeber_x000D_
Type 2	DiabetesM
Type 2	Diabetes:M
Type 2	Diabetes:M
Type 2	Diabetes:m
Type 2	Diabetes Uk app
Type 2	diabetes uk
Type 2	Diabetes Typ 2 f�r IOS
Type 2	Diabetes Tagebuch
Type 2	Diabetes Plus
Type 2	Diabetes Pilot - to record blood sugars_x000D_ Carb Manager - to help with food choices
Type 2	Diabetes Kit
Type 2	Diabetes Kit
Type 2	Diabetes Connect
Type 2	Diabetes Connect
Type 2	Diabetes 101
Type 2	DiaApp
Type 2	Dexcom_x000D_ MyFitnessPal_x000D_ Calorie Counter_x000D_
Type 2	DEXCOM G 5
Type 2	Dexcom _x000D_ Clarity_x000D_ Sugarmate_x000D_ Carelink
Type 2	Dexcom
Type 2	Dario. It is extremely bad, incorrect. I do not use it any more. I always compared it to my normal meter and the Dario was sometimes 10 points more.
Type 2	Dario System
Type 2	Dario I use it all the time_x000D_
Type 2	DARIO glucose meter
Type 2	Dario
Type 2	Daily Dozen
Type 2	Cornerstones4Care, Diabetes On Track_x000D_ Accu-Chek Connect
Type 2	Contour_x000D_ ketodiet_x000D_
Type 2	Contour_x000D_ Diabetes:M_x000D_ My Net Diary: Diabetes
Type 2	Contour Next One
Type 2	Contour Next
Type 2	Contour diabetes app
Type 2	Contour
Type 2	Contour
Type 2	Contour
Type 2	Contour
Type 2	contour
Type 2	Chronometer to monitor fats and carbs
Type 2	carrenty
Type 2	CarbManager_x000D_ OneTouch
Type 2	CalorieKing_x000D_ One Touch Bluetooth Monitoring System
Type 2	Blood Sugar Manager from LeanWeb
Type 2	Blood glucose by japps
Type 2	Blood glucose
Type 2	BGluMon
Type 2	Apple Health app for recording blood glucose readings
Type 2	AgaMatrix
Type 2	Accuchek_x000D_ _x000D_ I use a non diabetes app for food tracking - My Fitness Pal
Type 2	Accu-chek Guide
Type 2	Accu-Chek Connect
Type 2	Accu-chek connect
Type 2	Accu-Chek
Type 2	Accuchek
Type 2	Accu chek connect
Type 2	Accu- check connect
Type 2	Accu check
